# Supplementary material
Source: publisher site journal article supplement (https://www.dovepress.com/article/253812)

## SUPPLEMENTARY RESULTS

Table E1. Baseline patient characteristics

| Variable                                                                            |                         | Total (N= 11,337)      |
|-------------------------------------------------------------------------------------|-------------------------|------------------------|
| Year of index date (ID)                                                             | Mean (SD)               | 2006.8 (2.9)           |
|                                                                                     | Median (IQR)            | 2007.0 (2005.0;2009.0) |
| Follow-up after ID, years                                                           | Mean (SD)               | 8.8 (2.2)              |
|                                                                                     | Median (IQR)            | 8.2 (7.0;10.1)         |
| Age group                                                                           | 35-59, n (%)            | 3,233 (28.5)           |
|                                                                                     | 60-79, n (%)            | 7,302 (64.4)           |
|                                                                                     | 80+, n (%)              | 802 (7.1)              |
| Rhinitis diagnosis                                                                  | Never, n (%)            | 8,916 (78.6)           |
|                                                                                     | Active, n (%)           | 1,717 (15.1)           |
|                                                                                     | Ever, not active, n (%) | 704 (6.2)              |
| Eczema diagnosis                                                                    | Never, n (%)            | 9,267 (81.7)           |
|                                                                                     | Active, n (%)           | 328 (2.9)              |
|                                                                                     | Ever, not active, n (%) | 1,742 (15.4)           |
| Nasal polyps diagnosis                                                              | Ever, n (%)             | 142 (1.3)              |
| Chronic sinusitis diagnosis                                                         | Ever, n (%)             | 650 (5.7)              |
| Gastroesophageal reflux disease diagnosis                                           | Ever, n (%)             | 1,476 (13.0)           |
| Diabetes Mellitus diagnosis                                                         | Ever, n (%)             | 976 (8.6)              |
| Osteoporosis diagnosis                                                              | Ever, n (%)             | 465 (4.1)              |
| Hypertension diagnosis                                                              | Ever, n (%)             | 3,943 (34.8)           |
| Ischemic heart disease diagnosis                                                    | Ever, n (%)             | 1,891 (16.7)           |
| Heart failure diagnosis                                                             | Ever, n (%)             | 345 (3.0)              |
| Chronic kidney disease diagnosis                                                    | Ever, n (%)             | 506 (4.5)              |
| Depression diagnosis                                                                | Ever, n (%)             | 2,437 (21.5)           |
| Anxiety diagnosis                                                                   | Ever, n (%)             | 2,327 (20.5)           |
| Sleep apnoea diagnosis                                                              | Ever, n (%)             | 65 (0.6)               |
| Sleep disorder diagnosis                                                            | Ever, n (%)             | 1,328 (11.7)           |
| Oral corticosteroids (OCS) courses, number in year prior to ID                      | 0, n (%)                | 9,268 (81.8)           |
|                                                                                     | 1, n (%)                | 1,406 (12.4)           |
|                                                                                     | 2, n (%)                | 423 (3.7)              |
|                                                                                     | 3, n (%)                | 134 (1.2)              |
|                                                                                     | ≥4, n (%)               | 106 (0.9)              |
| Antibiotics courses with lower respiratory consultation, number in year prior to ID | None, n (%)             | 6,287 (55.5)           |
|                                                                                     | 1, n (%)                | 2,671 (23.6)           |
|                                                                                     | 2, n (%)                | 1,346 (11.9)           |
|                                                                                     | 3, n (%)                | 577 (5.1)              |
|                                                                                     | ≥4, n (%)               | 456 (4.0)              |
| Mean daily dose of oral corticosteroids in year prior to ID (mg /day)               | N (% non-missing)       | 2,957 (26.1)           |
|                                                                                     | No OCS, n (%)           | 470 (15.9)             |
|                                                                                     | <2.5, n (%)             | 2,205 (74.6)           |
|                                                                                     | 2.5 to <5, n (%)        | 178 (6.0)              |
|                                                                                     | 5 to <7.5, n (%)        | 54 (1.8)               |
|                                                                                     | ≥7.5, n (%)             | 50 (1.7)               |
| Daily SABA dose (µg /day)                                                           | No SABA, n (%)          | 4,378 (38.6)           |
|                                                                                     | 1-100, n (%)            | 2,492 (22.0)           |

| Variable                                                                                  |                              | Total (N= 11,337) |
|-------------------------------------------------------------------------------------------|------------------------------|-------------------|
|                                                                                           | 101-200, n (%)               | 1,837 (16.2)      |
|                                                                                           | 201-300, n (%)               | 860 (7.6)         |
|                                                                                           | 301-400, n (%)               | 489 (4.3)         |
|                                                                                           | >400, n (%)                  | 1,281 (11.3)      |
| Any SAMA prescriptions                                                                    | Yes, n (%)                   | 1,919 (16.9)      |
| Type of therapy within 120 days prior to index date (spirometry around time of diagnosis) | Minimal or no therapy, n (%) | 6,722 (59.3)      |
|                                                                                           | LAMA or LABA, n (%)          | 641 (5.7)         |
|                                                                                           | ICS monotherapy, n (%)       | 1,859 (16.4)      |
|                                                                                           | ICS+(LABA or LAMA), n (%)    | 1,708 (15.1)      |
|                                                                                           | LABA+LABA, n (%)             | 24 (0.2)          |
|                                                                                           | Triple therapy, n (%)        | 383 (3.4)         |
| General practice (GP) consultations, COPD-related, number in year prior to ID             | None, n (%)                  | 2,102 (18.5)      |
|                                                                                           | 1, n (%)                     | 8,226 (72.6)      |
|                                                                                           | 2-4, n (%)                   | 961 (8.5)         |
|                                                                                           | 5-7, n (%)                   | 44 (0.4)          |
|                                                                                           | ≥8, n (%)                    | 4 (0.0)           |
| GP consultations, all-cause, number in year prior to ID                                   | 0-1, n (%)                   | 97 (0.9)          |
|                                                                                           | 2-4, n (%)                   | 1,238 (10.9)      |
|                                                                                           | 5-8, n (%)                   | 2,786 (24.6)      |
|                                                                                           | 9-13, n (%)                  | 3,036 (26.8)      |
|                                                                                           | 14-17, n (%)                 | 1,598 (14.1)      |
|                                                                                           | 18-22, n (%)                 | 1,220 (10.8)      |
|                                                                                           | ≥23, n (%)                   | 1,362 (12.0)      |

COPD = Chronic obstructive pulmonary disease; OCS = oral corticosteroids; ICS = Inhaled corticosteroid; IQR = Interquartile range; SD = Standard deviation; SABA = Short acting  $\beta_2$  agonist; SAMA = Short acting muscarinic antagonist.

Supplementary Figure E1. The association between the number of years with  $\geq 1$  exacerbation and FEV<sub>1</sub> at time of diagnosis (Left) and rate of FEV<sub>1</sub> decline (Right) for patients treated with and without ICS prior to spirometry.

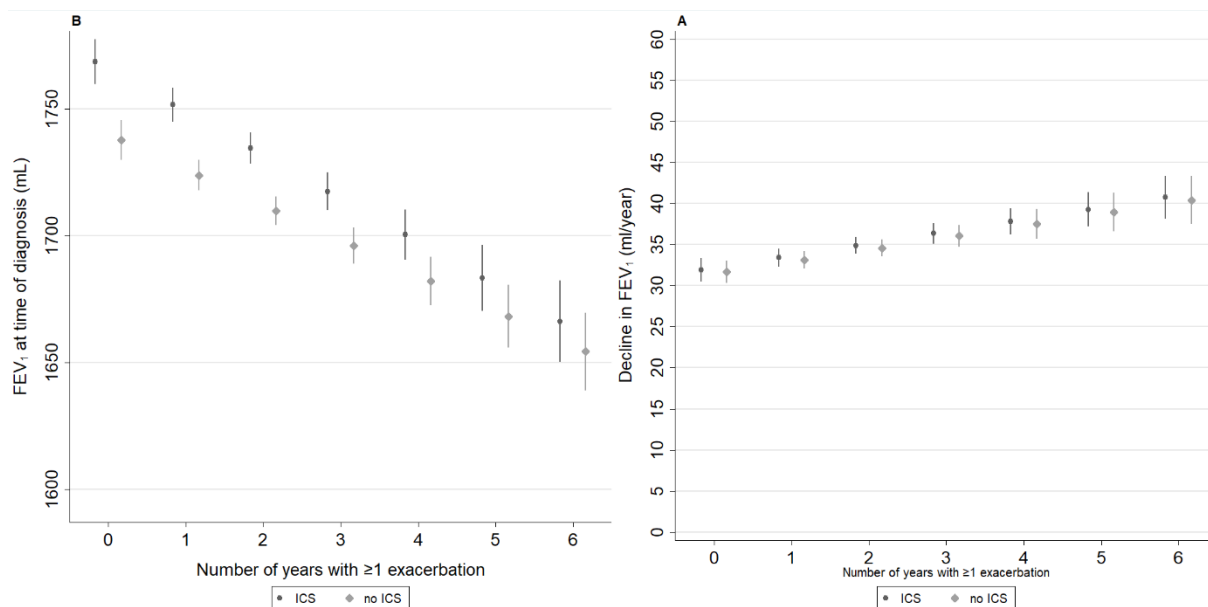

Supplementary Figure E2. Sensitivity analysis excluding 5,647 (6.8%) FEV<sub>1</sub> values recorded within 2 weeks before or after occurrence of an exacerbation showing the relationship of the number of years with  $\geq 1$  exacerbation with FEV<sub>1</sub> at time of diagnosis (Left) and rate of FEV<sub>1</sub> decline (Right).

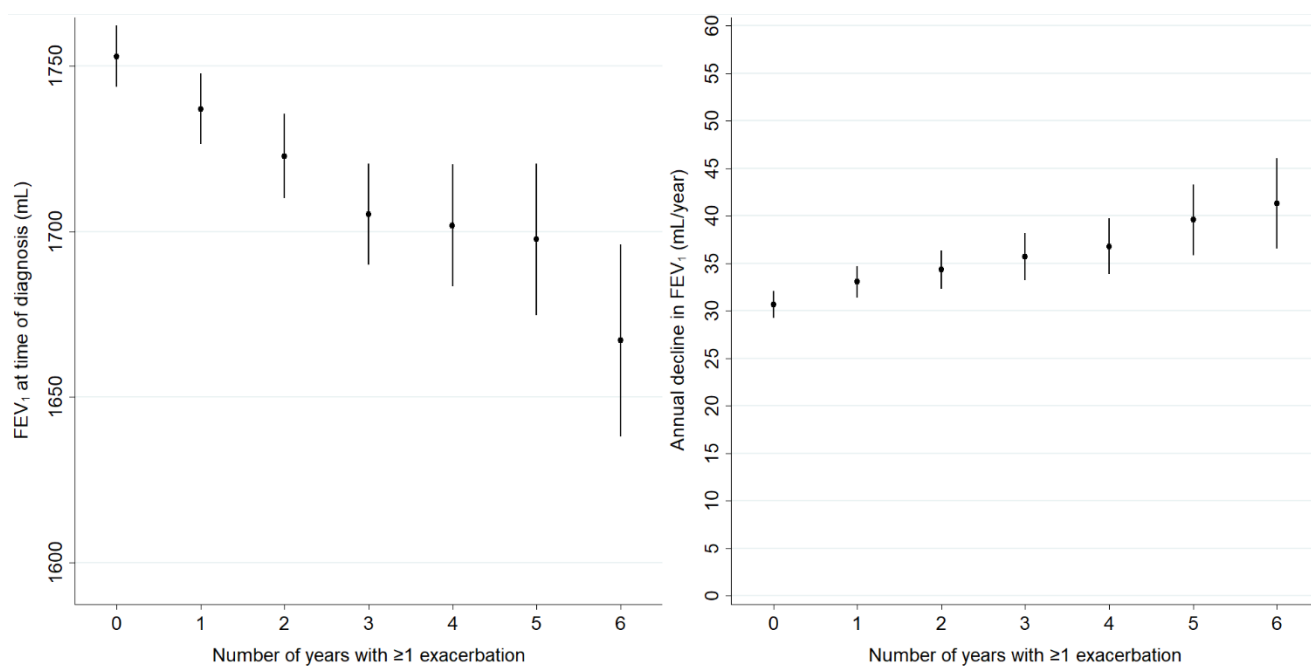

Supplementary Figure E3. Sensitivity analysis excluding 1,413 (12.6%) patients who were ever diagnosed with asthma showing the relationship of the number of years with  $\geq 1$  exacerbation with FEV<sub>1</sub> at time of diagnosis (Left) and rate of FEV<sub>1</sub> decline (Right).

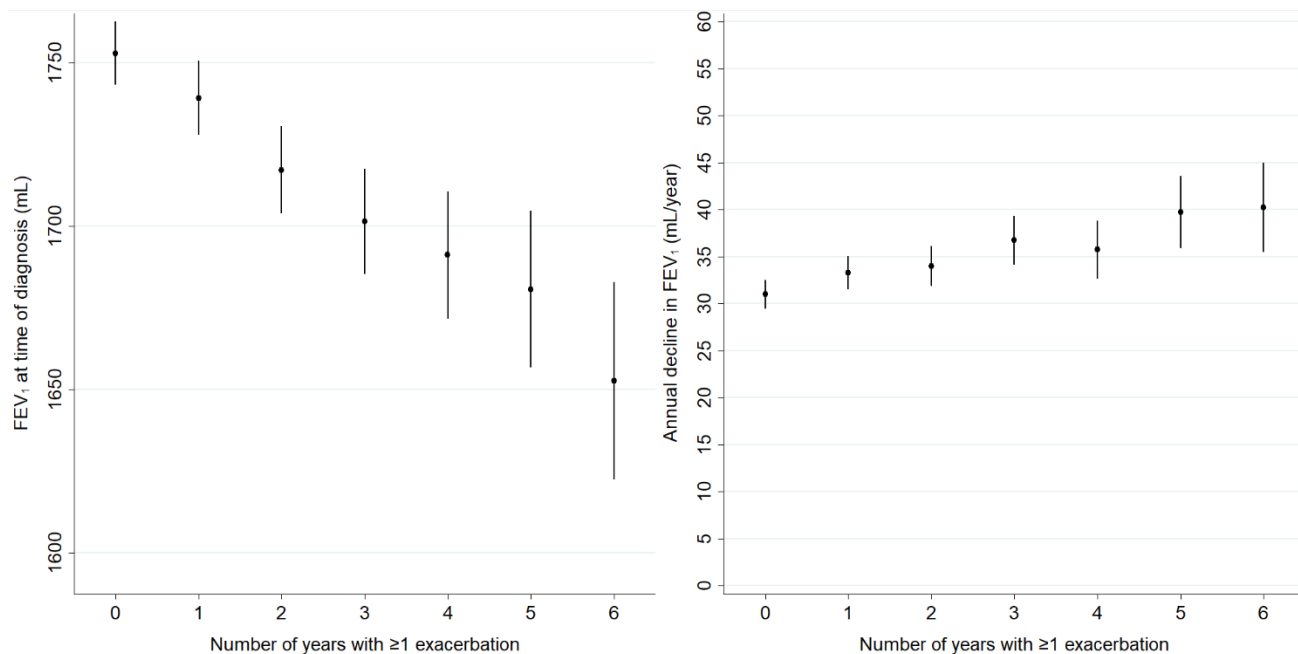

Supplement: Supplementary file 1 [file get_supplementary_file.php]
